# Supplementary material
Source: Research Square preprint supplement (doi:10.21203/rs.3.rs-9337757/v1)
Supplement: Supplementary file 2 [file 458347c656a4ed0abba2cf8c.docx]

# **7. Appendix**

Table A1: List of gun tilt angle, average power, and average discharge voltage (Vd) used in the four depositions. A zero degree angle indicates that the sputter gun has been tilted away from factory setting and points down to the bottom of the chamber to decrease rate of deposition for associated species. Discharge voltages are averages obtained from the Lesker datalog recorded during deposition (values obtained every 1 sec).

| Deposition ID | Gun tilt angles for Pt:Au (deg) | Sputter Power  to Pt (Watts) | Sputter Power  to Au (Watts) | Vd for Pt (Volts) | Vd for Au (Volts) |
| --- | --- | --- | --- | --- | --- |
| 1 | 20:0 | 150 | 50 | 432 | 311 |
| 2 | 20:20 | 100 | 100 | 399 | 352 |
| 3 | 20:20 | 150 | 50 | 430 | 311 |
| 4 | 0:20 | 50 | 150 | 376 | 340 |
